# Supplementary material for: PTBP1-associated microRNA-1 and -133b suppress the Warburg effect in colorectal tumors
Source: PubMed Central journal article supplement (PMC4951342; doi:10.18632/oncotarget.8005), 2016-03-09
Supplement: oncotarget-07-18940-s001.pdf [file oncotarget-07-18940-s001.pdf]

## PTBP1-associated microRNA-1 and -133b suppress the Warburg effect in colorectal tumors

### Supplementary Materials

#### MATERIALS AND METHODS

##### Western blotting analysis

Primary antibodies used were as follow: anti-mTOR (Cell Signaling Technology, Inc., Danvers, MA, USA). Information on other primary antibodies were described in the main text.

##### Gene silencing

The sequence of siR-PKM2 was 5'-CAGAC UUGGUGAGGACGAUUAUGGC-3'.

##### PTBP1 overexpression experiments

The PTBP1 expression vector was constructed by insertion of the open reading frame (ORF) of PTBP1 cDNA into the SgfI and PmeI sites of the pF5A-CMV *neo* vector (Promega). DLD-1 was used as template of PTBP1 cDNA. Human PTBP1 was cloned by polymerase chain reaction (PCR) amplification from human brain cDNA (QUICK-Clone™ cDNA, Clontech). The primers for ORF-PTBP1 were the following: ORF-PTBP1-sense, 5'-GGGCGATCGCCATGGACGGCATTGTCCCAG-3', and ORF-PTBP1-antisense, 5'-CCGTTTAAACCTAGAT

GGTGGACTTGGAGA-3'. Amplified fragments were digested by Flexi enzyme mix (Promega) and ligated into the pF5A-Flag-*neo* vector. On the day before the transfection, the cells were seeded into 6-well plates at a concentration of  $0.5 \times 10^5$ /well. We transfected the cells at 0.1  $\mu$ g/well with the control vector or pF5A-PTBP1 expression vector by using Lipofectamine 2000 (Invitrogen). The effects were assessed at 24 h after the transfection.

##### Agents

5-Aza-2'-deoxycytidine (5-Aza) was obtained from Sigma Aldrich (St Louis, MO, USA). All cells tested were treated with 5-AZA (5, 10  $\mu$ M). The effects of 5-Aza were assessed at the appropriate time for each cell line. The lipid mixture used was obtained from Sigma-Aldrich (St Louis, MO, USA). It contained arachidonic acid, linoleic acid, linolenic acid, myristic acid, palmitic acid, and stearic acid and was designated as FA. We added FA at 10  $\mu$ l/1 ml of medium. L-Glutamine was obtained from Thermo Fisher Scientific (Waltham, MA USA). We added 200 mM L-Glutamine at 10  $\mu$ l/1 ml of medium.

Detail methods of experiments were described in main text.

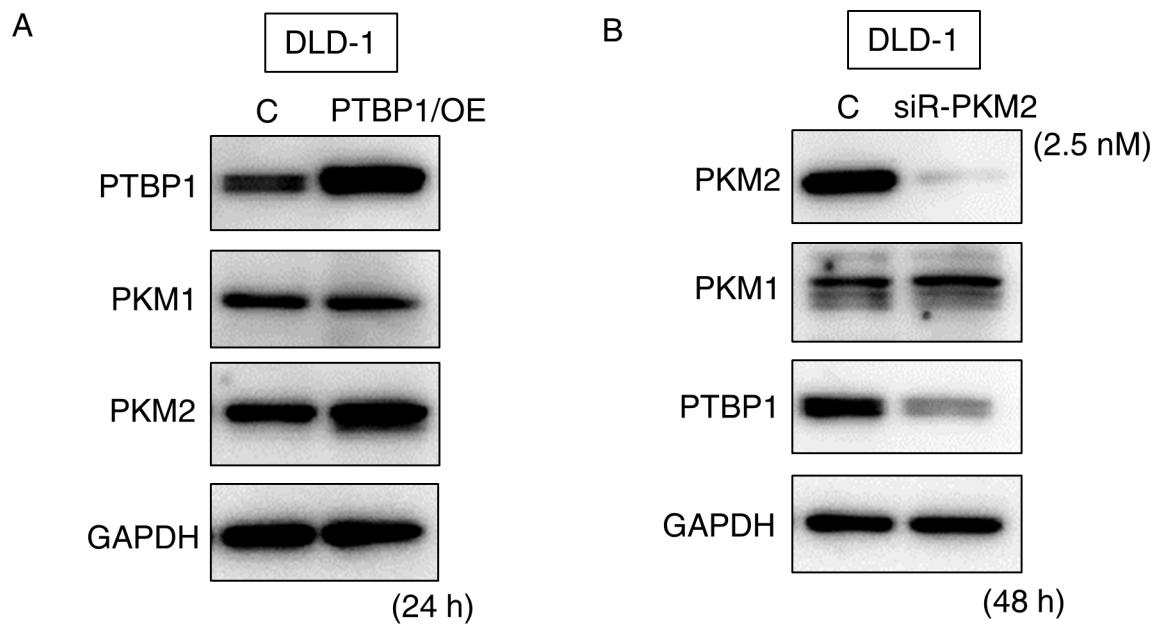

**Supplementary Figure S1:** (A) Protein expression of Warburg effect-associated genes at 24 h after transfection of DLD-1 cells with pF5A-PTBP1 (0.1  $\mu$ g). (B) Protein expression of Warburg effect-associated genes at 48 h after transfection of DLD-1 cells with siR-PKM2 (2.5 nM).

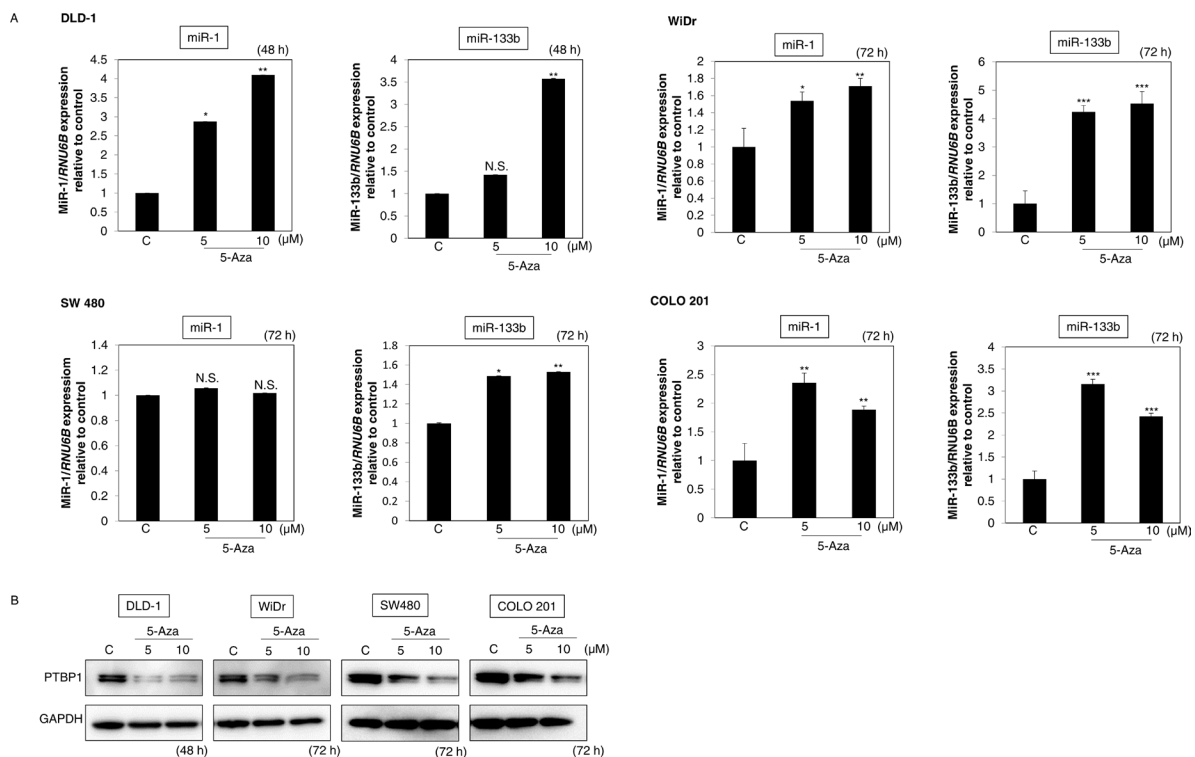

**Supplementary Figure S2:** (A) Expression levels of miR-1 and -133b in various colon cancer cells after treatment of them with 5-Aza (5 or 10  $\mu$ M). The expression levels of the miRs were assessed at 48 h after the treatment in DLD-1 cells. Those in WiDr, SW480, and COLO 201 were assessed at 72 h. U6 was used as the control. (B) Expression of PTBP1 in 5-Aza-treated colon cancer cells. Assessment time was the same as in “A”. GAPDH was used as the control. Results are presented as the mean  $\pm$  SD; \* $P$  < 0.05; \*\* $P$  < 0.01; \*\*\* $P$  < 0.001.

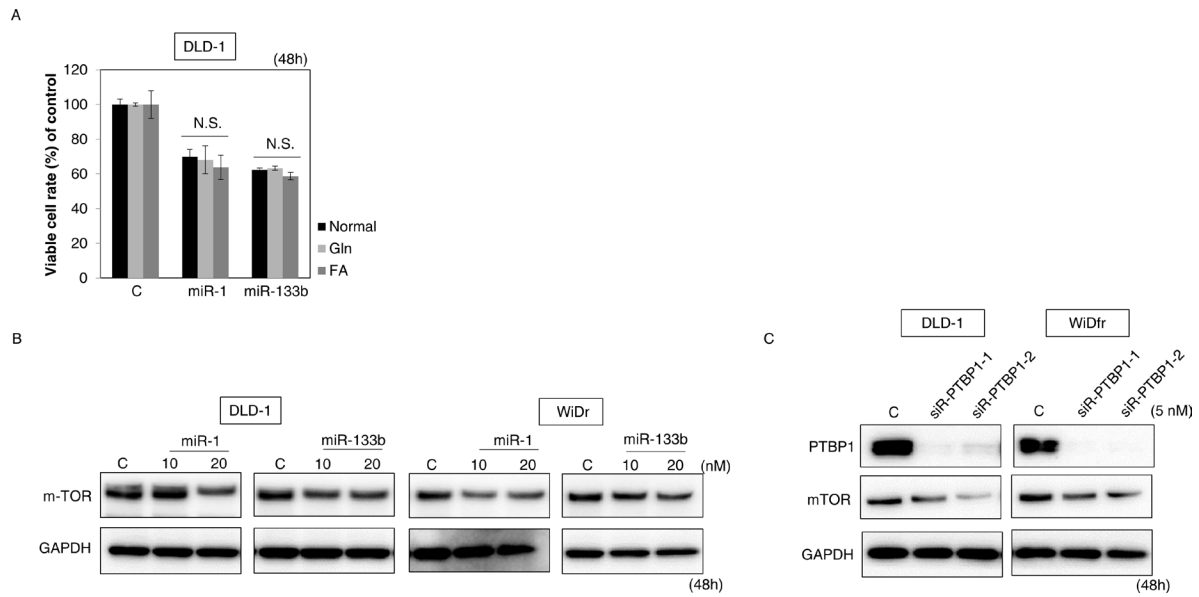

**Supplementary Figure S3:** (A) Effects of glutamine or fatty acid on cell growth of DLD-1 cells transfected with either miR. Glutamine or fatty acid was added at 5 h after the transfection with miR-1 and miR-133b (20 nM). We assessed the effects at 48 h after the addition of glutamine or fatty acid. Normal: RPMI-1640 with FBS, Gln: addition of glutamine to RPMI-1640 with FBS, FA: addition of fatty acid to RPMI-1640 with FBS (B) Protein expression of mTOR at 48 h after transfection with miR-1 or -133b (10, 20 nM). GAPDH was used as the control. (C) Protein expression of PTBP1 and m-TOR at 48 h after transfection of DLD-1 and WiDr cells with siR-PTBP1 (5 nM). GAPDH was used as the control. Results are presented as the mean  $\pm$  SD; N.S., not statistically significant.

**Supplementary Table S1: Clinicopathological features of colorectal tumors examined for PTBP1 expression (Figure 6E)**

| Case | Age | Sex <sup>a</sup> | Site <sup>b</sup> | Size <sup>c</sup> | Depth <sup>d</sup> | Stage <sup>e</sup> | PTBP1 <sup>g</sup> | miR-1(T/N) <sup>h</sup> | miR-133b (T/N) <sup>h</sup> |
|------|-----|------------------|-------------------|-------------------|--------------------|--------------------|--------------------|-------------------------|-----------------------------|
| 1    | 49  | F                | R                 | 70                | SS                 | B                  | +                  | 0.180                   | 0.041                       |
| 2    | 53  | F                | R                 | 45                | SS                 | B                  | +                  | 0.030                   | 0.018                       |
| 3    | 68  | M                | R                 | 65                | SE                 | D                  | +                  | 0.006                   | 0.009                       |
| 4    | 59  | F                | S                 | 60                | SE                 | C                  | +                  | 0.570                   | 0.293                       |
| 5    | 73  | M                | R                 | 40                | MP                 | A                  | +                  | 0.102                   | 0.181                       |
| 6    | 56  | F                | S                 | 27                | SS                 | C                  | +                  | 0.138                   | 0.143                       |
| 7    | 67  | M                | S                 | 55                | MP                 | A                  | +                  | 0.550                   | 0.310                       |
| 8    | 78  | F                | C                 | 80                | SI                 | C                  | +                  | 0.050                   | 0.017                       |
| 9    | 52  | M                | S                 | 25                | MP                 | A                  | +                  | 0.160                   | 0.055                       |
| 10   | 38  | F                | RS                | 95                | MP                 | A                  | ±                  | 0.053                   | 0.072                       |
| 11   | 62  | M                | S                 | 55                | SS                 | D                  | +                  | 0.130                   | 0.150                       |
| 12   | 60  | M                | R                 | 68                | SS                 | C                  | +                  | 0.074                   | 0.090                       |
| 13   | 81  | M                | RS                | 50                | MP                 | C                  | +                  | 0.100                   | 0.020                       |
| 14   | 73  | F                | T                 | 55                | SS                 | B                  | +                  | 0.254                   | 0.190                       |
| 15   | 49  | M                | R                 | 50                | SS                 | B                  | +                  | 0.137                   | 0.046                       |
| 16   | 68  | F                | R                 | 35                | SS                 | B                  | +                  | 0.487                   | 0.100                       |
| 17   | 92  | M                | S                 | 25                | MP                 | A                  | +                  | 0.036                   | 0.212                       |
| 18   | 62  | M                | R                 | 39                | MP                 | A                  | +                  | 0.299                   | 0.134                       |
| 19   | 83  | F                | D                 | 28                | SS                 | B                  | +                  | 0.445                   | 0.203                       |
| 20   | 49  | F                | R                 | 45                | MP                 | A                  | +                  | 0.017                   | 0.015                       |
| 21   | 64  | F                | A                 | 29                | SS                 | C                  | +                  | 0.162                   | 0.075                       |
| 22   | 61  | F                | S                 | 39                | M                  | A                  | +                  | 0.003                   | 0.009                       |
| 23   | 79  | M                | S                 | 42                | MP                 | C                  | +                  | 0.028                   | 0.021                       |
| 24   | 18  | F                | A                 | 65                | SE                 | C                  | +                  | 0.046                   | 0.024                       |
| 25   | 73  | M                | S                 | 10                | SM                 | A                  | +                  | 0.270                   | 0.120                       |
| Case | Age | Sex <sup>a</sup> | Site <sup>b</sup> | Size <sup>c</sup> | Grade <sup>e</sup> | Stage              | PTBP1 <sup>g</sup> | miR-1(T/N) <sup>h</sup> | miR-133b (T/N) <sup>h</sup> |
| 26   | 50  | F                | S                 | 20                | H                  | /                  | +                  | 0.160                   | 0.070                       |
| 27   | 54  | F                | S                 | 20                | L                  | /                  | +                  | 0.210                   | 0.250                       |
| 28   | 66  | F                | A                 | 15                | L                  | /                  | +                  | 0.270                   | 0.340                       |
| 29   | 79  | M                | S                 | 15                | L                  | /                  | +                  | 0.060                   | 0.060                       |
| 30   | 73  | M                | R                 | 10                | H                  | /                  | +                  | 0.330                   | 0.140                       |

We examined PTBP1 expression in 30 cases that were available for obtaining protein samples.

a M, male; F, female.

b Location of tumor; C, cecum; A, ascending colon; T, transverse colon; S, sigmoid colon; RS, rectosigmoid colon; R, rectum.

c Diameter in mm.

d M, mucosa; SM, submucosa; MP, Mucosa propria; SS, Subserosa; SE, Serosa exposure; SI, Serosa invasion.

e Dukes' system.

f L, low grade adenoma (mild and moderate atypia); H, high grade adenoma (sever atypia).

g +, overexpression; ±, no overexpression.

h The relative ratio of miR-1 or -133b (tumor tissue/normal adjacent tissue).

The ratio < 0.67 as down-regulation.
